# Supplementary material for: Ultrathin sandwich-like MoS2@N-doped carbon nanosheets for anodes of lithium ion batteries
Source: Royal Society of Chemistry journal article supplement (doi:10.1039/c4nr06215a), 2014-11-19
Supplement: c4nr06215a1.pdf [file c4nr06215a1.pdf]

Electronic Supplementary Material (ESI) for Nanoscale.  
This journal is © The Royal Society of Chemistry 2014

## Supporting Information

### Ultrathin Sandwich-like MoS<sub>2</sub>/N-doped Carbon Nanosheets for Anodes of Lithium-ion Batteries

*Jae-Min Jeong, Kyoung G. Lee, Sung-Jin Chang, Jung Won Kim, Young-Kyu Han, Seok Jae Lee, and Bong Gill Choi\**

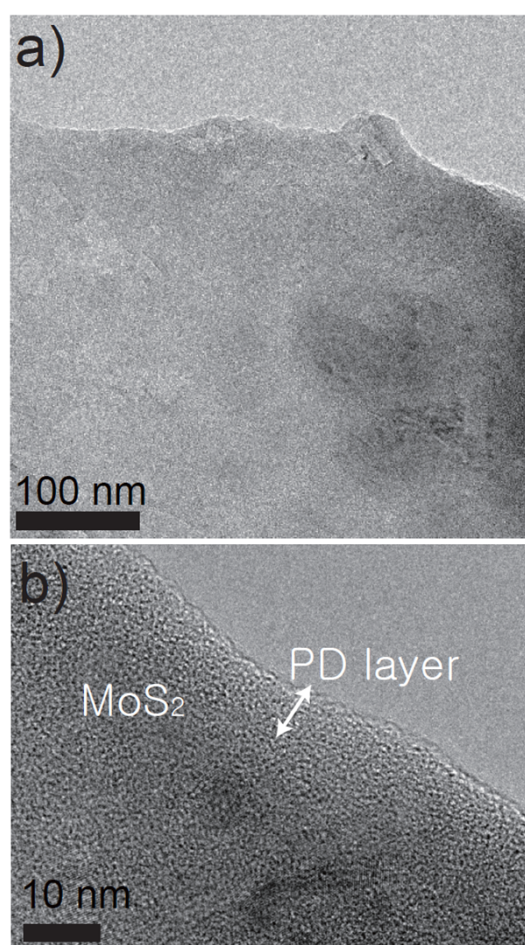

**Fig. S1** (a) and (b) TEM images for MoS<sub>2</sub>@PD samples.

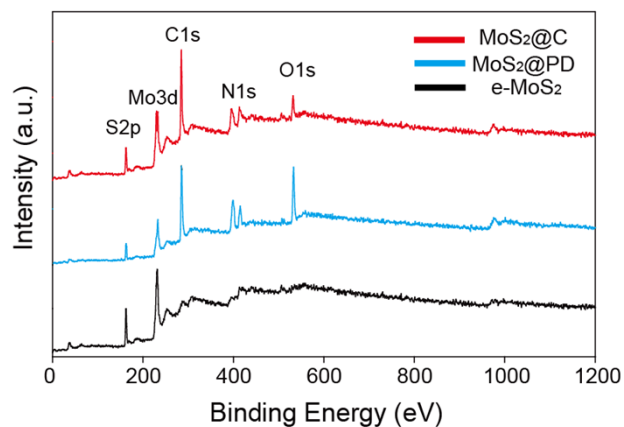

**Fig. S2** Survey XPS spectra of MoS<sub>2</sub>@C, MoS<sub>2</sub>@PD, e-MoS<sub>2</sub> samples.

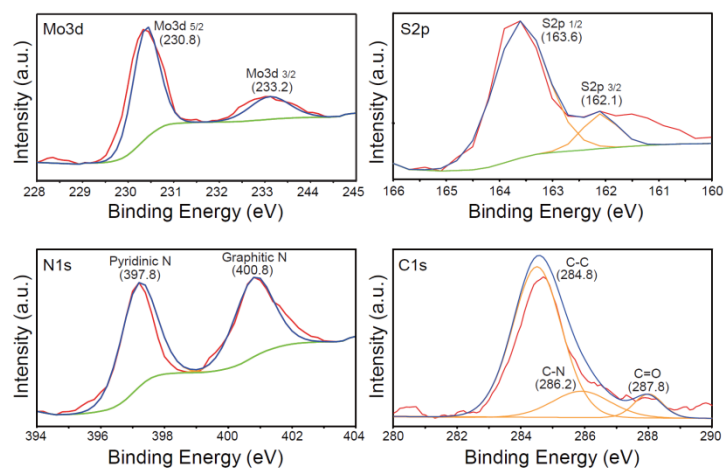

**Fig. S3** High resolution XPS spectra of Mo 3d, S 2p, N 1s, and C 1s on MoS<sub>2</sub>@C samples.

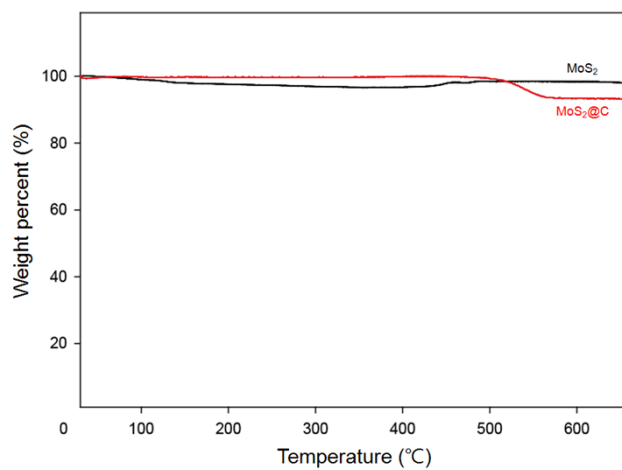

**Fig. S4** Thermogravimetric analysis of MoS<sub>2</sub>@C and MoS<sub>2</sub> samples.

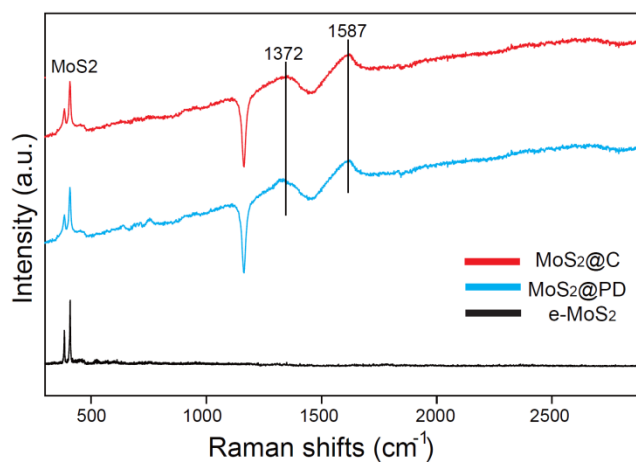

**Fig. S5** Raman spectra of e-MoS<sub>2</sub>, MoS<sub>2</sub>@C and MoS<sub>2</sub>@PD samples.
